1     **The role of genetic diversity in the evolution and maintenance of environmentally-cued,**  
2                                   **male alternative reproductive tactics**

3

4                                   Stewart KA<sup>1§\*</sup>, Draaijer R<sup>1§</sup>, Kolasa MR<sup>2</sup>, Smallegange IM<sup>1</sup>

5

6     <sup>1</sup>Department of Evolutionary Population Biology, Institute for Biodiversity and Ecosystem  
7     Dynamics, University of Amsterdam, PO Box 94240, 1090 GE, Amsterdam, The Netherlands

8

9     <sup>2</sup>Institute of Systematics and Evolution of Animals, Polish Academy of Sciences,  
10    Slawkowska 17 St., 31-016 Krakow, Poland

11

12    §Authors declare equal first-author contribution

13

14    \*Corresponding Author: Kathryn A. Stewart, Tel: +31684354319, Email:

15    stewart.a.kat@gmail.com

16

17

18

19

20

21

22

23

24

25

26 **Abstract**

27 **Background**

28 Alternative reproductive tactics (ARTs) are taxonomically pervasive strategies adopted by  
29 individuals to maximize reproductive success within populations. Even for conditionally-  
30 dependent traits, consensus postulates most ARTs involve both genetic and environmental  
31 interactions (GEIs), but to date, quantifying genetic variation underlying the threshold  
32 disposing an individual to switch phenotypes in response to an environmental cue has been a  
33 difficult undertaking. Our study aims to investigate the origins and maintenance of ARTs  
34 within environmentally disparate populations of the microscopic bulb mite, *Rhizoglyphus*  
35 *robini*, that express ‘fighter’ and ‘scrambler’ male morphs mediated by a complex  
36 combination of environmental and genetic factors.

37 **Results**

38 Using never-before-published individual genetic profiling, we found all individuals across  
39 populations are highly inbred with the exception of scrambler males in stressed environments.  
40 In fact within the poor environment, scrambler males and females showed no significant  
41 difference in genetic differentiation ( $F_{st}$ ) compared to all other comparisons, and although  
42 fighters were highly divergent from the rest of the population in both poor or rich  
43 environments (e.g.,  $F_{st}$ , STRUCTURE), fighters demonstrated approximately three times less  
44 genetic divergence from the population in poor environments. AMOVA analyses further  
45 corroborated significant genetic differentiation across subpopulations, between morphs and  
46 sexes, and among subpopulations within each environment.

47 **Conclusion**

48 Our study provides new insights into the origin of ARTs in the bulb mite, highlighting the  
49 importance of GEIs: genetic correlations, epistatic interactions, and sex-specific inbreeding  
50 depression across environmental stressors. Asymmetric reproductive output, coupled with the

51 purging of highly inbred individuals during environmental oscillations, also facilitates genetic  
52 variation within populations, despite evidence for strong directional selection. This cryptic  
53 genetic variation also conceivably facilitates stable population persistence even in the face of  
54 spatially or temporally unstable environmental challenges. Ultimately, understanding the  
55 genetic context that maintains thresholds, even for conditionally-dependent ARTs, will  
56 enhance our understanding of within population variation and our ability to predict responses  
57 to selection.

58 **Keywords:**

59 *inbreeding depression, epistasis, genetic correlation, environmental threshold model,*  
60 *phenotypic plasticity, conditional strategy*

61

62

63

64

65

66

67

68

69

70

71

72

73

74

75

## 76 **Background**

77 In numerous species, it is common for individuals (usually males) to adopt different strategies  
78 to increase their reproductive success when intrasexual competition is intense. These  
79 strategies can ultimately lead to diversity within populations, comprising of characteristics  
80 such as behaviour, physiology, or morphology [1]. Referred to as alternative reproductive  
81 tactics (ARTs), strategies such as these encompass trade-offs between increased reproductive  
82 potential versus the costs incurred to produce traits under selection, often leading to the  
83 development of a less energetically demanding tactic, such as sneakers (versus guards) or  
84 satellites (versus callers). Although taxonomically widespread and studied in various  
85 organisms [1], the proximate mechanisms responsible for ART trait evolution, or the  
86 processes that maintain ARTs within single populations are not always well understood.  
87 Some ARTs are plastic by nature, driven by seemingly pure environmental effects (e.g., dung  
88 beetles, *Onthophagus acuminatus*; [2]), whereas others are fixed, determined exclusively by  
89 genetic underpinnings (e.g. lekking sandpiper, *Philomachus pugnax*; [3]), although the latter  
90 remains a relatively rarer phenomenon [4–6]. More commonly however, species  
91 demonstrating ARTs involve a combination of both genetic and environmental influences,  
92 that interrelate in genotype-by-environment interactions [7].

93         Genotype-by-environment interactions (GEIs) are routinely observed in traits linked to  
94 fitness [8] such that in different environments, numerous genotypes may display and switch  
95 superiority (ecological cross-over), assisting in the maintenance of variation within  
96 populations. Moreover, male sexually selected traits often show condition-dependence that is  
97 assumed to involve many loci, providing ample opportunity for mutations (‘genic capture  
98 hypothesis’ [9]) and genetic variation. For example, high genetic diversity (heterozygosity)  
99 has been linked to an individual’s fitness and condition, including an increase in survival [10,  
100 11], parasite resistance [12], developmental stability [13], competitive ability [14], viability

101 [9, 15, 16], mating opportunities [17], and the expression of costly secondary sexually  
102 selected traits [18]. Together, GEIs and condition-linked genetic diversity may help to  
103 reconcile the origin and maintenance of ARTs within populations [19], despite presumably  
104 strong selective forces promoting the canalization of traits, and genetic erosion associated  
105 with sexual selection ('the lek paradox') [19, 20].

106       Currently, the environmental threshold model, which links condition-dependence and  
107 GEIs [21–23], is the most widely accepted process for ART expression. Specifically, this  
108 model posits that environmental circumstances experienced by an individual during ontogeny  
109 leads to an all-or-none response in terms of expressing ARTs, which in-turn is likely  
110 influenced by the organism's genetic background [23]. Male polymorphic variation is thus  
111 thought of as a threshold trait based on a continuously distributed phenotype that is  
112 environmentally sensitive [24]. Threshold traits have been shown to have a heritable basis,  
113 although more likely due to the heritability of the underlying threshold itself (liability traits)  
114 [25, 26]. If this polymorphic variation is under polygenic control, condition-linked genetic  
115 diversity likely plays an important role in trait expression. ARTs involve complex traits that  
116 can be heritable, subject to selection, and evolve, yet to date, the genetic basis underlying the  
117 evolution of conditionally-dependent ARTs has been difficult to quantify [27].

118       The bulb mite (*Rhizoglyphus robini*) is a microscopic agricultural pest, which thrives  
119 on invading crops and disperses easily when food is deprived (a species familiar with  
120 fluctuating environment conditions) [28]. This species demonstrates a short generation time,  
121 has high reproductive potential [29], and is easily reared in laboratory conditions, making it  
122 an ideal organism for experimental evolution studies. Intriguingly, the bulb mite demonstrates  
123 a complex ART system that has recently described up to three male polymorphisms, including  
124 a 'megascrambler' [30] that, due to its rareness within populations, will be excluded from the  
125 current study. Of the two prominent male ARTs in *R. robini*, individuals express either a

126 ‘fighter’ or ‘scrambler’ mating tactic consisting of the ontogenetic development (or not) of  
127 weaponry comprised of a thickened, sharply terminated third pair of legs used to combat and  
128 kill rival males (fighters and scramblers, respectively) (Fig. 1). The environmental threshold  
129 model is a good candidate model to explain the evolution of this male dimorphism as high  
130 nutritional quality and quantity during development increases juvenile body size, which in  
131 turn increases fighter morph expression in adulthood [31, 32]. An experimental test of this  
132 model’s predictions on evolutionary shifts in ART expression indeed confirmed threshold  
133 shifts when selecting against fighter expression. This analysis, however, failed to capture the  
134 observed evolutionary threshold shifts when selecting against scrambler expression [33],  
135 likely because scrambler expression shifted evolutionarily in response to the demographic  
136 consequences of the experimental treatment, rather than the treatment itself. It therefore seems  
137 likely that multiple environmental drivers are involved to maintain this male dimorphism  
138 [34]. Previous research also demonstrates the bulb mite ART is somewhat heritable, yet these  
139 heritability scores vary widely depending on population or study, ranging between 0.18 to  
140 >1.00 based on experimental and modelling estimates [35–37], further suggesting this ART  
141 likely does not represent a simplistic environmental or genetic trigger.

142         Here, we aim to resolve broad evolutionary questions surrounding the origin and  
143 maintenance of ARTs by quantifying the cryptic variance underpinning threshold responses to  
144 environmental cues. We do this by testing the hypothesis that genetic diversity differs  
145 between the two male ARTs in the bulb mite such that larger fighters with associative high  
146 body condition will demonstrate higher levels of genetic diversity compared to their smaller,  
147 poorer conditioned scrambler counterparts. Using populations consisting of tens-of-thousands  
148 of individual bulb mites reared under different environments, we quantified underlying  
149 genetic context in relation to ART expression, using never before published genetic markers  
150 to quantify individual-level genetic diversity across populations.

151

## 152 **Materials & Methods**

### 153 *Specimen maintenance and collection*

154 We used bulb mites from stock populations originating from 10 sampling sites via  
155 collecting flower bulbs near Anna Paulowna, North Holland, Netherlands in 2010, that  
156 ultimately comprise tens-of-thousands of individuals. Mites were reared and maintained at the  
157 Institute for Biodiversity and Ecosystem Dynamics at the University of Amsterdam,  
158 Netherlands in a controlled environmental chamber ( $25 \pm 1$  °C, 60% relative humidity, 16:8h  
159 light-dark photoperiod; sensu [38]) under two different rearing environments commonly used  
160 in life history studies to assess growth, development, and ART expression of mites from the  
161 family Acaridae (e.g., [39–41]). These two environments, henceforth be described as ‘poor’  
162 or ‘rich’, differed only in their nutritional resources; mites were fed either rolled oats (poor  
163 food quality) or dried yeast (rich food quality via high quantity of protein), ad libitum. The  
164 rich resource treatment (yeast), in fact, creates a similar rearing environment to that of natural  
165 bulb mite populations feeding on garlic bulbs [39].

166 From the rich and poor environments, mites were randomly collected and examined  
167 with a stereomicroscope for identification. Sexes and ART morphs were identified according  
168 to the morphological criteria described by Smallegange [38], including size delimitation,  
169 genitalia, and the presence/absence of enlarged third leg pairs (main ART trait  
170 differentiation). Following recommendations that 20-30 individuals assayed within  
171 populations yield sufficiently reliable estimates for population genetic parameters [42], a total  
172 of 231 mites were sampled from the stock populations in both rich (n=126) and poor (n=105)  
173 environments, including 72 scambler males (rich n=42, poor n=30), 76 fighter males (rich  
174 n=32, poor n=44), and 83 females (rich n=52, poor n=31). Upon collection, mites were

175 individually preserved in 1.5 mL Eppendorf tubes containing 95% ethanol, and stored at -  
176 20°C until DNA extraction.

177 Because we aimed to create equal sampling of each subpopulation (female, fighter,  
178 scrambler), the representative sex-ratio from the overall environments did not reflect the  
179 female biased operational sex-ratio from either stock or natural populations [33]. However,  
180 this sampling scheme, should bear no influence on our interpretation of whether genetic  
181 context influences the expression of ARTs in the bulb mite system.

182

### 183 *DNA extraction, PCR amplification, and nSSR analysis*

184 Prior to extraction, all ethanol within the Eppendorf tubes was evaporated. For the female,  
185 and fighter male mites, we used a modified protocol from Knecht *et al.* [43] in which chelex-  
186 based DNA extraction was performed: 4-5 zirconium beads, 50µL of a 5% chelex solution  
187 (Bio-Rad laboratories), and 5µL of proteinase K (20 mg ml<sup>-1</sup>) were added to each tube, after  
188 which the samples were homogenized 3 times for 30s at 6500 rpm using a Precellys24 tissue  
189 homogenizer (Bertin Corp). Upon homogenization, the samples were incubated for 2 hours at  
190 56 °C, and proteinase K was inactivated via incubation for 8 minutes at 95°C. Samples were  
191 centrifuged for 2 minutes at 14000 rpm and thereafter stored at -20°C.

192 As scrambler male mites are typically much smaller than their fighter or female  
193 counterparts, we adjusted the DNA extraction protocol as follows: after the evaporation of all  
194 ethanol, 4.5µL proteinase K (20 mg ml<sup>-1</sup>) was added to each Eppendorf tube, and with a  
195 pestle, mites were ground into small pieces, after which 30µL of a 5% chelex solution was  
196 added to each tube. The samples were subsequently incubated for 3 hours at 56 °C, and  
197 proteinase K was inactivated via incubation for 8 minutes at 95°C. Samples were vortexed  
198 and centrifuged shortly, and stored at -20°C prior to DNA amplification.



199 In total we tested 16 nuclear simple sequence repeats (nSSR) primer pairs designed for  
200 our species at Jagiellonian University in Kraków [44], optimizing the primer pairs and  
201 concomitant PCR protocol for our own populations using Dreamtaq polymerase (Thermo  
202 Fisher Scientific). Each primer pair was amplified individually in 15µL reactions wherein  
203 each reaction contained 3µL 5 X Dreamtaq buffer, 3µL dNTPs (10µM), 0.5µL MgCl<sub>2</sub>, 0.5µL  
204 BSA, forward and reverse primers (see Table 1 for concentrations), and 0.125µL Dreamtaq  
205 polymerase. Prior to adding DNA template, DNA samples were briefly vortexed and spun-  
206 down to separate the DNA solution from the chelex beads. To each sample, 2µL of DNA  
207 template was added. The thermal cycle protocol started at 95°C for 15 min, followed by 35  
208 cycles of denaturation at 94°C for 30 s, annealing at either 51 °C or 53 °C (see Table 1) for 90  
209 s, extension at 72°C for 90 s, and a final extension at 72 °C for 10 minutes. PCR products  
210 were stored at 7 °C until analysis (within 1 week of extraction). Samples were visually  
211 inspected using 2% agarose gel electrophoresis before fragmentation analysis.

212 Primer pairs were labelled with four different fluorescent tags, allowing them to be  
213 multiplexed and analysed simultaneously using capillary electrophoresis (ABI PRISM 3100  
214 Genetic Analyzer, Applied Biosystems). Per two amplicons (differently labelled), 1µL of  
215 PCR product, 0.3µL of orange dye labelled GeneScan™ size standard 500LIZ™ (Applied  
216 Biosystems), and 10µL formamide was added and denatured before running on the ABI  
217 analyzer. Data was visualised, and alleles were scored, in GeneMapper™ software (v4.1.1)  
218 (Applied Biosystems), after which each automatically scored allele was double-checked by  
219 hand. Our nSSRs were defined by a characteristic stutter followed by a peak of at least 450  
220 relative fluorescent units or greater. We further assayed approximately 10% of our samples a  
221 second time to check and ensure repeatability of scoring.

222

223 *Statistical analyses*

224 With the use of GenoDive v.2.28 [45] that accounts for information gaps by drawing random  
225 alleles from the baseline allele frequencies (e.g., missing or null alleles, ensuring no  
226 individuals were excluded from analysis), various metrics of genetic diversity were  
227 calculated. Beyond calculating the number of alleles per locus ( $n_A$ ), we also quantified  
228 observed heterozygotes within a subpopulation (i.e., females, fighters, scramblers) ( $H_O$ ) and  
229 expected frequency of heterozygotes ( $H_S$ ) under Hardy-Weinberg equilibrium (HWE) [46],  
230 both ranging from 0 to 1. These metrics were then used to calculate the inbreeding coefficient  
231 ( $G_{IS}$ ), and determined whether subpopulations departed from HWE (ranging from -1, more  
232 heterozygosity than expected, to 1, less heterozygosity than expected). To measure genetic  
233 divergence among subpopulations, Wright's  $F_{ST}$  was estimated according to F-statistics  
234 defined by Weir & Cockerham [47], whereby the ratio of heterozygosity within the  
235 subpopulation is compared to the total population (ranges from 0 - little to no genetic  
236 divergence between populations, to 1 - total divergence between subpopulations).

237 We also performed an analysis of molecular variance (AMOVA) [48] in GenoDive to  
238 test for population genetic structure; calculations were performed on four different  
239 hierarchical levels (between environments [rich and poor], between subpopulations [sexes and  
240 morphs] within environment, among individuals within subpopulations, and within  
241 individuals), and gives us insight in the genetic differentiation between these different levels.  
242 Statistical significance was evaluated based on 999 random permutations and distances were  
243 calculated using the Infinite Alleles Model.

244 We further subsampled 30 random individuals per group and performed the same  
245 analyses with the aim to control for possible artefacts or bias within our analyses stemming  
246 from missing data or unequal sampling. Random subsampling and reanalysis was performed 5  
247 times (exemplar represented in Additional File 2, Table S2.1-S2.5).

248 STRUCTURE analysis (GenoDive v2.28 [45]; STRUCTURE add-in [49]) was  
249 additionally used to infer genetic clustering using the multilocus nSSR data within  
250 populations (rich and poor environment) among the respective subpopulations (i.e. females,  
251 scramblers and fighters). This analysis used a Monte Carlo Markov Chain (MCMC) to  
252 identify genetically distinct clusters by assigning individuals to K clusters based on  
253 assignment probability (Q-value), minimizing departures from HWE and linkage equilibrium.  
254 We used a  $5 \times 10^3$  burn-in, followed by  $5 \times 10^4$  iterations assuming admixture and correlated  
255 allele frequencies without prior population information. We ran 1 to 10 K clusters, with 20  
256 replicates for each cluster. Optimal population clusters were determined according to delta K  
257 [50] and bar plot visualisations were compiled using the program STRUCTURE PLOT [51].

258

## 259 **Results**

260 After protocol optimization, we found only 9 of the 16 nSSRs amplified well for our  
261 populations, of which 3 loci revealed fixation, and 6 demonstrating both clean/readable peaks  
262 and polymorphism across individuals. Thus, these 6 nSSRs were chosen for the genotyping of  
263 all remaining individuals.

264 Across individuals, we had a total of 12.3% missing or null alleles; 3.6% in females,  
265 12.8% in males (25.9% in fighters, 3.7% in scramblers). In the poor environment (19.1%),  
266 missing data for females was 5.4%, and for males, 20.5% (34.5% in fighters, and 0.00% in  
267 scramblers). In the rich environment (10.2%), missing data for females was 8.65%, and for  
268 males, 9.68% (14.1% in fighters, and 6.4% in scramblers). We additionally detected 11  
269 private alleles across 5 loci that differentiated between males and females, and 12 alleles that  
270 segregate between the rich (4) or poor (8) environments (Additional File 1, Table S1).

271 Across all individuals, allelic richness remained low, ranging from 3 to 11 alleles per  
272 locus. For four loci, significant deviations from HWE were detected demonstrating an excess

273 of homozygosity present across individuals (Table 1). Deviations from HWE were also  
274 detected within our rich and poor environments (Table 2), where rich environments contained  
275 significantly lower levels of heterozygosity across all individuals compared to expectation.  
276 Poor environments similarly demonstrated lower than expected levels of heterozygosity  
277 across all individuals, with the exception of scramblers that were shown to not significantly  
278 differ from expectation. These patterns also corresponded to significant levels of inbreeding  
279 ( $G_{IS}$ ), with the exception of scramblers in the poor environment.

280 Pairwise genetic differentiation between environments (rich and poor) differed  
281 significantly ( $F_{ST} = 0.109$ ,  $p < 0.001$ ) between the subpopulations (female, fighter and  
282 scambler) within their respective environments (Table 3), with the exception of scramblers  
283 compared to females in the poor environment. Although fighters and scramblers significantly  
284 differed from each other within both environments (rich and poor), genetic differentiation was  
285 approximately three times lower in the poor environment compared to the rich environment  
286 ( $F_{ST} = 0.036$ ,  $p < 0.001$ , and  $F_{ST} = 0.102$ ,  $p < 0.001$ , respectively). These results corroborate the  
287 findings that fighters were significantly more genetically divergent compared to scramblers  
288 within either environment (Fig. 2).

289 AMOVA analysis (Table 4) showed significant genetic differentiation across  
290 subpopulations (females, fighters, and scramblers;  $F_{SC} = 0.085$ ,  $p < 0.001$ ), between morphs  
291 (fighters, and scramblers;  $F_{SC} = 0.073$ ,  $p < 0.001$ ), and between sexes (females, males;  $F_{SC} =$   
292  $0.069$ ,  $p < 0.001$ ). Subpopulations within environment were also genetically different from one  
293 another ( $F_{SC} = 0.085$ ,  $p < 0.001$ ), but the environments (rich and poor) do not differ from the  
294 total population ( $F_{CT} = 0.083$ ,  $p = 0.206$ ).

295 With the exception of locus Rrms 72 demonstrating no significant deviations from  
296 HWE (Additional File 2), our subsampled analyses demonstrated near identical results in

297 accordance with our original data set, suggesting any missing/null alleles and unequal  
298 sampling within our populations had negligible impact on our results.

299 Our STRUCTURE analysis demonstrated 2 genetic clusters based on delta K [50]  
300 ( $K=2$ ) best fit our data. Genetic clustering similarly illustrated females and scramblers to  
301 disproportionately cluster together compared to fighter individuals that formed their own  
302 genetic cluster, although this pattern was more stark in rich compared to poor environments  
303 (Fig. 3).

304

## 305 **Discussion**

306 Despite previous formative work focusing on sex- and morph-specific population mean  
307 transcriptome patterns in *R. robini* [52, 53], this study is the first of its kind to quantify  
308 individual-level genetic diversity in the bulb mite, building a foundation for further genetic  
309 quantification investigations for this microscopic organism. Importantly, due to this  
310 individual-level approach, the results from this study demonstrate that ARTs in the bulb mite  
311 system are associated with genetic diversity, which in-turn is further connected with  
312 environmental effects (GEIs). The finding that GEIs underlie the pattern of ARTs is likely to  
313 have important repercussions to our understanding of selection in this species, and may help  
314 to resolve the previously (but confined) observations for genetic (e.g., [52, 53] ) and  
315 environmental (e.g., [33, 35, 54]) components operating to mediate male trait expression.  
316 GEIs may further help to explain how this polymorphism is maintained within populations  
317 over time, notwithstanding often disparate and fluctuating environmental challenges.

318

319 *GEIs, genetic context, and the origin of bulb mite ARTs*

320 Counter to our hypothesis for genetic diversity-condition links within our male morphs, we  
321 find evidence that large fighters are less genetically variable than their smaller scambler

322 counterparts. As fighters have been shown to achieve higher reproductive success than  
323 scamblers [55], while also being capable of killing conspecifics within populations [56, 57],  
324 it is not entirely surprising that these individuals are less genetically diverse simply as a by-  
325 product of effective population size reduction [58], and thus genetic erosion. Indeed, both  
326 mating monopolization and increased survival likely combine to effectively limit the genetic  
327 pool in ensuing fighter offspring. Alternatively, sex-specific effects of inbreeding depression  
328 on fitness are also plausible [59], especially in light of high inbreeding consequences on  
329 female bulb mite fecundity in general [31]. Previous studies have proposed that the fitness  
330 decline of *R. robini* females derived from fighter selection-lines is evidence for intralocus  
331 sexual conflict [60]. Our observations that fighters are more inbred than scambler males,  
332 could equally imply that inbred females are less fit and have a higher probability of being  
333 purged within populations, similar to life-span and mortality patterns observed in another  
334 invertebrate with sex-specific inbreeding depression [61].

335         A non-mutually exclusive but more adaptive explanation for the origins of the genetic  
336 patterns underlying bulb mite ART expression could be their genetic context, or the relation  
337 and interaction of genes underpinning this phenotype (epistasis or genetic correlation). Non-  
338 additive, epistatic combinations [62, 63] are likely more important than individual genetic  
339 components, with pervasive effects from selection to speciation [64]. These genetic  
340 interactions have also previously been shown to influence complex traits [65], alter  
341 evolutionary trajectories of phenotypes [66], and underlie missing heritability [67].

342         In the bulb mite specifically, *positive epistasis* could be responsible for fighter  
343 expression, such that many alleles in conjunction work in a way that synergistically  
344 outperforms their individual contributions to genetically determine the fighter phenotype.  
345 Similarly, if many alleles in coordination lead to a less fit phenotype than expected based on  
346 their effects in singularity, the process may give rise to a new/alternative phenotype within a

347 population; certain genetic elements combinations may also mask the effects of others  
348 (antagonistic epistasis), functionally suppressing the manifestation of high fitness traits (e.g.,  
349 [68]). The last two aforementioned processes of *negative epistasis* could conceivably produce  
350 scramblers within our populations.

351 Correspondingly, genetic correlations among traits could equally link genetic  
352 components together causing similar patterns to the ones we see here. ART-specific genetic  
353 correlations have been previously shown in another invertebrate taxa [69], and the breakdown  
354 of co-adaptive gene-complexes has been implicated in the adoption of a flexible condition-  
355 dependent ART [70], together suggesting that genetic context may be a pervasive, important,  
356 but under-investigated facet to ART research. Indeed, markedly distinct genetic patterns  
357 among ARTs may be expected owing to the correlational selection for various trait optima  
358 combinations between morphs. Ultimately, this correlational selection will result in linkage  
359 disequilibrium (opposed and eroded by recombination) having far-reaching evolutionary  
360 consequences such as the loss of genetic variation, especially for species frequently  
361 undergoing genetic drift through founder effects [7].

362 Insomuch as complex gene-network for traits are presumed ubiquitous [71], and  
363 pleiotropic effects in a single locus for systems necessary to support multi-faceted plasticity  
364 (e.g., in morphology, physiology, behaviour) seems dubious [7], it's likely that heterozygosity  
365 in the bulb mite breaks apart genetic elements that require the coordination for the expression  
366 of the fighter phenotype, such as specialized developmental trajectories, large body size,  
367 aggression, and weaponry. Accordingly, the threshold for fighter development may require a  
368 reduction to heterozygosity, such that when heterozygosity within populations decreases, the  
369 threshold for fighter expression concomitantly also decreases. Threshold shifts as a response  
370 to ART relative fitness would then reflect cryptic genetic variation underlying the translation  
371 of the environmental cue to phenotype in a condition-genotype coupling [27]. Future *R. robini*

372 work should aim to assess whether these same GEI patterns are also reflected in natural  
373 populations. However, as these broad GEI associations remain consistent between rearing  
374 environments, and our rich environment reflects similar natural history responses to that of  
375 natural resources (e.g., garlic bulbs [39]), we have no reason to believe that stock and natural  
376 populations would differ in their overall patterns of ART genetic context.

377

### 378 *Population-level diversity and the maintenance of ARTs*

379 Considerable variation has been observed in the effects and strength of inbreeding depression,  
380 among environments, populations of the same species, and even within sexes (e.g., [61, 72–  
381 74]). Our study demonstrates that bulb mites generally lack genetic diversity across  
382 individuals, but this pattern could stem from a number of scenarios. For example, in our  
383 investigation, near even numbers of scrambler, fighter, and females were collected and  
384 compared, yet in reality (stock and wild populations), operational sex-ratios are female  
385 skewed ([33, 57], pers. observation), and ART frequencies fluctuate within populations based  
386 on environmental milieu [54]. In effect, the average genetic contribution of fighters both  
387 within poor and rich environments, compared to the combined contribution of scamblers and  
388 females, is likely highly over-represented. Moreover, lab reared populations are known to  
389 undergo genetic drift and demonstrate lower than average genetic diversity compared to their  
390 wild counterparts [75–77]. However, similar to other species [73], bulb mites may also  
391 display a general lack of inbreeding consequences. That said, the combined evidence that  
392 fighter phenotypes achieve higher reproductive success than scamblers [55], and that bulb  
393 mite ARTs demonstrate some level of heritability [35–37] but no frequency-dependence [34,  
394 55], has continuously raised questions as to how these male polymorphisms are sustained  
395 within populations. Certainly the added evidence that fighter phenotypes are also associated  
396 with excess homozygosity (this study) further complicates our understanding of how male



397 phenotypic and genetic variation are sustained in this system. Here we link the genetic  
398 architecture and life-history parameters of ARTs with oscillating environmental conditions,  
399 and suggest that these evolutionary-ecological dynamics may hold the answer.

400 Previous empirical evidence in bulb mites not only demonstrates that scrambler  
401 morphs live longer [78], but importantly, that scrambler-selected lines produce more females  
402 that lay larger and more eggs over a longer period of time [79], and are generally more fecund  
403 than fighter-selected lines [60]. These morph-specific patterns may help to elucidate why we  
404 observed the genetic architecture of scramblers and females to be more similar to each other  
405 in contrast to fighters, patterns corroborated in gene expression profiles [52]. Similarly, these  
406 reproductive patterns may also help explain how fluctuating environmental conditions, and  
407 thus the ensuing shifts in ART frequencies, assist in maintaining genetic diversity within this  
408 species. For example, individuals that accumulated deleterious mutations otherwise buffered  
409 in optimal conditions (e.g., fighters and possibly female offspring of fighters in the bulb mite)  
410 would eventually be purged within poor (presumably stressful) environments (e.g., [74]). This  
411 mutation-selection balance could also reduce the genetic differentiation between morphs and  
412 sexes, as seen in our bulb mite individuals raised in the poor environment. Certainly, genetic  
413 variation in the threshold underlying sensitivity to environmental cues, as assumed in the  
414 environmental threshold model [21, 22], would thus cause genetic, and therefore concomitant  
415 demographic, oscillation within populations, conceivably facilitating stable population  
416 persistence even in the face of spatially or temporally unstable environmental challenges.

417 Across taxa, processes for the maintenance of genetic diversity are especially  
418 significant as they serve as a means for populations to adapt to changing environments and  
419 thus play an important role for the survival of a species [80], including reducing its  
420 vulnerability to ecological challenges, such as disease or climate change [81]. Whether ARTs  
421 buffer populations from excessive inbreeding, and are more likely to evolve in species that

422 routinely encounter boom-bust cycles or environmental perturbations, is certainly a worthy  
423 future investigation.

424

## 425 **Conclusion**

426 The complexity, and need for organisms to interact with their environment (to adjust,  
427 acclimatize, development, and maximize fitness) implies that genetic context, and thus GEIs,  
428 are likely to be pervasive even among plastic phenotypes. Still, the evolution and proximate  
429 cause of these phenotypic alternatives are only beginning to be understood. Ultimately, our  
430 ability to accurately predict responses to selection based on the genetic variation that maintain  
431 thresholds for ARTs, and appreciating the relative genetic and environmental contributions  
432 influencing phenotypic expression, is critical to understanding both the breadth and  
433 maintenance of within-species variation and a populations capacity to adapt to external  
434 adjustments.

435

## 436 **Declarations**

437 Ethics Approval: In accordance with Dutch law, no ethics approval is required for work  
438 conducted on *Rhizoglyphus robini*.

439 Consent for Publication: not applicable

440 Availability of Data and Material: The datasets generated and/or analysed during the current  
441 study are available in the Dryad repository (uploaded upon acceptance).

442 Competing Interests: Authors declare no competing interests

443 Funding: This work was funded through a VIDI grant (no. 864.13.005) to IMS and KAS from  
444 the Netherlands Organisation for Scientific Research (NWO).

445 Authors' Contribution: KAS designed the experiment, MRK designed the primers, and RD  
446 performed the genetic amplifications and analysis. KAS and RD wrote the majority of the

447 manuscript, KAS, RD and IMS contributed to data interpretation. All authors read,  
448 commented on, and approved the final manuscript.

449 Acknowledgements: The authors would like to thank Patrick Meirmans for assistance with  
450 Genodive, Peter Kuperus for lab support, and Flor Rhebergen for invaluable discussions. We  
451 would also like to thank Jan van Arkel and Flor Rhebergen for their bulb mite visualisations.  
452 In particular, the authors thanks NWO for funding this research and the anonymous reviewers  
453 for their comments on earlier incarnations of the manuscript.

454

## 455 **References**

- 456 1. Oliveira RF, Taborsky M, Brockmann HJ. Alternative reproductive tactics. An integrative  
457 approach. 1st ed. Cambridge (UK): Cambridge University Press; 2008.
- 458 2. Emlen DJ. Environmental control of horn length dimorphism in the beetle *Onthophagus*  
459 *acuminatus* (*Coleoptera: Scarabaeidae*). Proc R Soc London Ser B Biol Sci. 1994;256:131–6.  
460 doi:10.1098/rspb.1994.0060.
- 461 3. Lank DB, Smith CM, Hanotte O, Burke T, Cooke F. Genetic polymorphism for alternative  
462 mating behaviour in lekking male ruff *philomachus pugnax*. Nature. 1995;378:59–62.
- 463 4. Shuster SM, Wade MJ. Equal mating success among male reproductive strategies in a  
464 marine isopod. Nature. 1991;350:608–10.
- 465 5. Sinervo B, Lively CM. The rock-paper-scissors game and the evolution of alternative male  
466 strategies. Nature. 1996;380:240–3.
- 467 6. Ocana SW, Meidl P, Bonfils D, Taborsky M. Y-linked Mendelian inheritance of giant and  
468 dwarf male morphs in shell-brooding cichlids. Proc R Soc B Biol Sci. 2014;281:20140253.  
469 doi:10.1098/rspb.2014.0253.
- 470 7. Neff BD, Svensson EI. Polyandry and alternative mating tactics. Philos Trans R Soc B Biol  
471 Sci. 2013;368:20120045. doi:10.1098/rstb.2012.0045.

- 472 8. Gillespie JH, Turelli M. Genotype-environment interactions and the maintenance of  
473 polygenic variation. *Genetics*. 1989;121:129–38. doi:10.1111/jcpp.12441.
- 474 9. Rowe L, Houle D. The lek paradox and the capture of genetic variance by condition  
475 dependent traits. *Proc R Soc London Ser B Biol Sci*. 1996;263:1415–21.  
476 doi:10.1098/rspb.1996.0207.
- 477 10. Markert JA, Grant PR, Grant BR, Keller LF, Coombs JL, Petren K. Neutral locus  
478 heterozygosity, inbreeding, and survival in Darwin’s ground finches (*Geospiza fortis* and *G.*  
479 *scandens*). *Heredity*. 2004;92:306–15. doi:10.1038/sj.hdy.6800409.
- 480 11. Jensen H, Bremset EM, Ringsby TH, Sæther BE. Multilocus heterozygosity and  
481 inbreeding depression in an insular house sparrow metapopulation. *Mol Ecol*. 2007;16:4066–  
482 78. doi:10.1111/j.1365-294X.2007.03452.x.
- 483 12. MacDougall-Shackleton EA, Derryberry EP, Foufopoulos J, Dobson AP, Hahn TP.  
484 Parasite-mediated heterozygote advantage in an outbred songbird population. *Biol Lett*.  
485 2005;1:105–7. doi:10.1098/rsbl.2004.0264.
- 486 13. Vangestel C, Mergeay J, Dawson DA, Vandomme V, Lens L. Developmental stability  
487 covaries with Genome-Wide and Single-Locus heterozygosity in house sparrows. *PLoS One*.  
488 2011;6:e21569. doi:10.1371/journal.pone.0021569.
- 489 14. Minias P, Minias A, Dziadek J. Heterozygosity correlates with body size, nest site quality  
490 and productivity in a colonial waterbird, the whiskered tern (*Chlidonias hybrida*, *Aves*:  
491 *Sternidae*). *J Zool Syst Evol Res*. 2015;53:133–9.
- 492 15. Mitton JB. Theory and data pertinent to the relationship between heterozygosity and  
493 fitness. In: *The Natural History of Inbreeding and Outbreeding: Theoretical and Empirical*  
494 *Perspectives*. Thornhill. Chicago: University of Chicago Press; 1993. p. 17–35.
- 495 16. Brown JL. A theory of mate choice based on heterozygosity. *Behav Ecol*. 1997;8:60–5.
- 496 17. Watt WB, Carter PA, Donohue K. Females’ choice of “good genotypes” as mates is

- 497 promoted by an insect mating system. *Science*. 1986;233:1187–90.
- 498 doi:10.1126/science.3738528.
- 499 18. Ferrer ES, García-Navas V, Bueno-Enciso J, Sanz JJ, Ortego J. Multiple sexual ornaments  
500 signal heterozygosity in male blue tits. *Biol J Linn Soc*. 2015;115:362–75.  
501 doi:10.1111/bij.12513.
- 502 19. Kokko H, Heubel K. Condition-dependence, genotype-by-environment interactions and  
503 the lek paradox. *Genetica*. 2008;134:55–62. doi:10.1007/s10709-008-9249-7.
- 504 20. Kirkpatrick M, Ryan MJ. The evolution of mating preferences and the paradox of the lek.  
505 *Nature*. 1991;350:33–8.
- 506 21. Hazel WN, Smock R, Johnson MD. A polygenic model for the evolution and maintenance  
507 of conditional strategies. *Proc R Soc B Biol Sci*. 1990;242:181–7.
- 508 22. Hazel W, Smock R, Lively CM. The ecological genetics of conditional strategies. *Am*  
509 *Nat*. 2004;163:888–900.
- 510 23. Tomkins JL, Hazel W. The status of the conditional evolutionarily stable strategy. *Trends*  
511 *Ecol Evol*. 2007;22:522–8. doi:10.1016/j.tree.2007.09.002.
- 512 24. Roff DA. Alternative Strategies: The Evolution of Switch Points. *Curr Biol*. 2011;21:285–  
513 7. doi:10.1016/J.CUB.2011.03.016.
- 514 25. Unrug J, Tomkins JL, Radwan J. Alternative phenotypes and sexual selection: Can  
515 dichotomous handicaps honestly signal quality? *Proc R Soc B Biol Sci*. 2004;271:1401–6.  
516 doi:10.1098/rspb.2004.2729.
- 517 26. Piché J, Hutchings JA, Blanchard W. Genetic variation in threshold reaction norms for  
518 alternative reproductive tactics in male Atlantic salmon, *Salmo salar*. *Proc R Soc B Biol Sci*.  
519 2008;275:1571–5. doi:10.1098/rspb.2008.0251.
- 520 27. Buzatto BA, Buoro M, Hazel WN, Tomkins JL. Investigating the genetic architecture of  
521 conditional strategies using the environmental threshold model. *Proc R Soc B Biol Sci*.

- 522 2015;282:20152075. doi:10.1098/rspb.2015.2075.
- 523 28. Deere JA, Coulson T, Smallegange IM. Life History Consequences of the Facultative  
524 Expression of a Dispersal Life Stage in the Phoretic Bulb Mite (*Rhizoglyphus robini*). PLoS  
525 One. 2015;10:e0136872. doi:10.1371/journal.pone.0136872.
- 526 29. Díaz A, Okabe K, Eckenrode CJ, Villani MG, Oconnor BM. Biology, ecology, and  
527 management of the bulb mites of the genus *Rhizoglyphus* (*Acarini: Acaridae*). Exp Appl  
528 Acarol. 2000;24:85–113. doi:10.1023/A:1006304300657.
- 529 30. Stewart KA, Van den Beuken TPG, Rhebergen FT, Deere JA, Smallegange IM. Evidence  
530 for a third male type in a male-dimorphic model species. Ecology. 2018;99:1685–7.  
531 doi:10.1002/ecy.2239.
- 532 31. Radwan J. Inbreeding depression in fecundity and inbred line extinction in the bulb mite,  
533 *Rhizoglyphus robini*. Heredity. 2003;90:371–6. doi:10.1038/sj.hdy.6800254.
- 534 32. Leigh DM, Smallegange IM. Effects of variation in nutrition on male morph development  
535 in the bulb mite *Rhizoglyphus robini*. Exp Appl Acarol. 2014;64:159–70.  
536 doi:10.1007/s10493-014-9822-y.
- 537 33. Smallegange IM, Deere JA. Eco-evolutionary interactions as a consequence of selection  
538 on a secondary sexual trait. Adv Ecol Res. 2014;50:145–69. doi:10.1016/B978-0-12-801374-  
539 8.00004-9.
- 540 34. Deere JA, Smallegange IM. Does frequency-dependence determine male morph survival  
541 in the bulb mite *Rhizoglyphus robini*? Exp Appl Acarol. 2014;62:425–36.  
542 doi:10.1007/s10493-013-9751-1.
- 543 35. Radwan JW. Male morph determination in two species of acarid mites. Heredity.  
544 1995;74:669–73. doi:10.1038/hdy.1995.91.
- 545 36. Radwan J. Heritability of male morph in the bulb mite, *Rhizoglyphus robini* (*Astigmata*,  
546 *Acaridae*). Exp Appl Acarol. 2003;29:109–14. doi:10.1023/A:1024260719013.

- 547 37. Smallegange IM, Coulson T. The stochastic demography of two coexisting male morphs.  
548 Ecology. 2011;92:755–64. doi:10.1890/09-2069.1.
- 549 38. Smallegange IM. Complex environmental effects on the expression of alternative  
550 reproductive phenotypes in the bulb mite. *Evol Ecol*. 2011;25:857–73. doi:10.1007/s10682-  
551 010-9446-6.
- 552 39. Gerson U, Capua S, Thorens D. Life history and life tables of *Rhizoglyphus robini*  
553 *Claparede* (Acari: Astigmata: Acaridae). *Acarologia*. 1983;24:439–48.
- 554 40. Gerson U, Cohen E, Capua S. Bulb mite, *Rhizoglyphus robini* (Astigmata: Acaridae) as an  
555 experimental animal. *Exp Appl Acarol*. 1991;12:103–10. doi:10.1007/BF01204403.
- 556 41. Radwan J. Male morph determination in *Rhizoglyphus echinopus* (Acaridae). *Exp Appl*  
557 *Acarol*. 2001;25:143–9. doi:10.1023/A:1010688516704.
- 558 42. Hale ML, Burg TM, Steeves TE. Sampling for microsatellite-based population genetic  
559 studies: 25 to 30 individuals per population is enough to accurately estimate allele  
560 frequencies. *PLoS One*. 2012;7:e45170. doi:10.1371/journal.pone.0045170.
- 561 43. Knecht B, Potter T, Pearson NA, Sato Y, Staudacher H, Schimmel BC, et al. Detection of  
562 genetic incompatibilities in non-model systems using simple genetic markers: Hybrid  
563 breakdown in the haplodiploid spider mite *Tetranychus evansi*. *Heredity*. 2017;118:311–21.  
564 doi:10.1038/hdy.2016.103.
- 565 44. Kolasa M. Markery mikrosatelitarne i zmienność genetyczna rozkruszką hiacyntowego  
566 (*Rhizoglyphus robini*). Jagiellonian University, Biology Department; 2015.
- 567 45. Meirmans PG, Van Tienderen PH. GENOTYPE and GENODIVE: Two programs for the  
568 analysis of genetic diversity of asexual organisms. *Mol Ecol Notes*. 2004;4:792–4.  
569 doi:10.1111/j.1471-8286.2004.00770.x.
- 570 46. Nei M. Estimation of average heterozygosity and genetic distance from a small number of  
571 individuals. *Genetics*. 1978;89:583–90. doi:10.3390/ijms15010277.

- 572 47. Weir BS, Cockerham CC. Estimating F-statistics for the analysis of population structure.  
573 Evolution. 1984;38:1358–70. doi:10.2307/2408641.
- 574 48. Excoffier L, Smouse PE, Quattro JM. Analysis of molecular variance inferred from metric  
575 distances among DNA haplotypes: Application to human mitochondrial dna restriction data.  
576 Genetics. 1992;131:479–91. doi:10.1007/s00424-009-0730-7.
- 577 49. Pritchard JK, Stephens M, Donnelly P. Inference of population structure using multilocus  
578 genotype data. Genetics 2000; 155:945-949.
- 579 50. Evanno, G, Sebastien R, Jérôme G. Detecting the number of clusters of individuals using  
580 the software STRUCTURE: a simulation study. Mol Ecol 2005; 14:: 2611-2620.
- 581 51. Ramasamy RK, Ramasamy S, Bindroo BB, Naik VG. STRUCTURE PLOT: a program  
582 for drawing elegant STRUCTURE bar plots in user friendly interface. Springerplus. 2014  
583 Aug 13;3:431. doi: 10.1186/2193-1801-3-431. eCollection 2014.
- 584 52. Stuglik MT, Babik W, Prokop Z, Radwan J. Alternative reproductive tactics and sex-  
585 biased gene expression: The study of the bulb mite transcriptome. Ecol Evol. 2014;4:623–32.  
586 doi:10.1002/ece3.965.
- 587 53. Joag R, Stuglik M, Konczal M, Plesnar-Bielak A, Skrzynecka A, Babik W, et al.  
588 Transcriptomics of intralocus sexual conflict: Gene expression patterns in females change in  
589 response to selection on male secondary sexual trait in the bulb mite. Genome Biol Evol.  
590 2016;8:2351–7. doi:10.1093/gbe/evw169.
- 591 54. Smallegange IM, Thorne N, Charalambous M. Fitness trade-offs and the maintenance of  
592 alternative male morphs in the bulb mite (*Rhizoglyphus robini*). J Evol Biol. 2012;25:972–80.  
593 doi:10.1111/j.1420-9101.2012.02490.x.
- 594 55. Radwan J, Klimas M. Male dimorphism in the bulb mite, *rhizoglyphus robini*: Fighters  
595 survive better. Ethol Ecol Evol. 2001;12:69–79. doi:10.1080/08927014.2001.9522788.
- 596 56. Radwan J, Czyż M, Konior M, Kołodziejczyk M. Aggressiveness in two male morphs of



- 597 the bulb mite *Rhizoglyphus robini*. *Ethology*. 2000;106:53–62.
- 598 57. Smallegange IM, Fernandes RE, Croll JC. Population consequences of individual  
599 heterogeneity in life histories: overcompensation in response to harvesting of alternative  
600 reproductive tactics. *Oikos*. 2018;127:738–49.
- 601 58. Reed DH, Frankham R. Correlation between fitness and genetic diversity. 2003;17:230-7
- 602 59. Ebel ER, Phillips PC. Intrinsic differences between males and females determine sex-  
603 specific consequences of inbreeding. *BMC Evol Biol*. 2016;16:36. doi:10.1186/s12862-016-  
604 0604-5.
- 605 60. Plesnar Bielak A, Skrzynecka AM, Miler K, Radwan J. Selection for alternative male  
606 reproductive tactics alters intralocus sexual conflict. *Evolution*. 2014;68:2137–44.  
607 doi:10.1111/evo.12409.
- 608 61. Fox CW, Scheibly KL, Wallin WG, Hitchcock LJ, Stillwell RC, Smith BP. The genetic  
609 architecture of life span and mortality rates: Gender and species differences in inbreeding load  
610 of two seed-feeding beetles. *Genetics*. 2006;174:763–73. doi:10.1534/genetics.106.060392.
- 611 62. Bateson W. *Mendel's principles of heredity*. Cambridge (UK): Cambridge University  
612 Press; 1909.
- 613 63. Fisher RA. The correlation between relatives on the supposition of Mendelian inheritance.  
614 *Trans R Soc Edinburgh*. 1918;52:399–433.
- 615 64. Wade MJ. A gene's eye view of epistasis, selection and speciation. *J Evol Biol*.  
616 2002;15:337–46.
- 617 65. Wei WH, Hemani G, Haley CS. Detecting epistasis in human complex traits. *Nat Rev*  
618 *Genet*. 2014;15:722–33. doi:10.1038/nrg3747.
- 619 66. Hill WG, Goddard ME, Visscher PM. Data and theory point to mainly additive genetic  
620 variance for complex traits. *PLoS Genet*. 2008;4:e1000008.  
621 doi:10.1371/journal.pgen.1000008.

- 622 67. Zuk O, Hechter E, Sunyaev SR, Lander ES. The mystery of missing heritability: Genetic  
623 interactions create phantom heritability. *Proc Natl Acad Sci.* 2012;109:1193–8.  
624 doi:10.1073/pnas.1119675109.
- 625 68. Agrawal AF, Whitlock MC. Environmental duress and epistasis: how does stress affect  
626 the strength of selection on new mutations? *Trends Ecol Evol.* 2010;25:450–8.  
627 doi:10.1016/J.TREE.2010.05.003.
- 628 69. Abbott JK, Svensson EI. Morph-specific variation in intersexual genetic correlations in an  
629 intra-specific mimicry system. *Evol Ecol Res.* 2010;:105–18.
- 630 70. Stewart KA, Hudson CM, Loughheed SC. Can alternative mating tactics facilitate  
631 introgression across a hybrid zone by circumventing female choice? *J Evol Biol.*  
632 2017;30:412–21. doi:10.1111/jeb.13017.
- 633 71. Weinreich DM, Lan Y, Wylie CS, Heckendorn RB. Should evolutionary geneticists worry  
634 about higher-order epistasis? *Curr Opin Genet Dev.* 2013;23:700–7.  
635 doi:10.1016/J.GDE.2013.10.007.
- 636 72. Fowler K, Whitlock MC. The variance in inbreeding depression and the recovery of  
637 fitness in bottlenecked populations. *Proc R Soc B Biol Sci.* 1999;266:2061–6.  
638 doi:10.1098/rspb.1999.0887.
- 639 73. Armbruster P, Armbruster P, Reed DH. Inbreeding depression in benign and stressful  
640 environments. *Heredity.* 2005;95:235–42. doi:10.1038/sj.hdy.6800721.
- 641 74. Enders LS, Nunnery L. Seasonal stress drives predictable changes in inbreeding depression  
642 in field-tested captive populations of *Drosophila melanogaster*. *Proc R Soc London B Biol*  
643 *Sci.* 2012;279:3756–3764. doi:10.1098/rspb.2012.1018.
- 644 75. Kawecki TJ, Lenski RE, Ebert D, Hollis B, Olivieri I, Whitlock MC. Experimental  
645 evolution. *Trends Ecol Evol.* 2012;27:547–60. doi:10.1016/j.tree.2012.06.001.
- 646 76. Slade B, Parrott ML, Paproth A, Magrath MJL, Gillespie GR, Jessop TS. Assortative

- 647 mating among animals of captive and wild origin following experimental conservation  
648 releases. *Biol Lett.* 2014;10:20140656. doi:10.1098/rsbl.2014.0656.
- 649 77. Lainhart W, Bickersmith SA, Moreno M, Rios CT, Vinetz JM, Conn JE. Changes in  
650 genetic diversity from field to laboratory during colonization of *Anopheles darlingi* root  
651 (*Diptera: Culicidae*). *Am J Trop Med Hyg.* 2015;93:998–1001. doi:10.4269/ajtmh.15-0336.
- 652 78. Plesnar-Bielak A, Skwierzyńska AM, Hlebowicz K, Radwan J. Relative costs and benefits  
653 of alternative reproductive phenotypes at different temperatures - Genotype-by-environment  
654 interactions in a sexually selected trait. *BMC Evol Biol.* 2018;18. doi:10.1186/s12862-018-  
655 1226-x.
- 656 79. Van den Beuken TPG, Smallegange IM. Life-history consequences of bidirectional  
657 selection for male morph in a male-dimorphic bulb mite. *Exp Appl Acarol.* 2018;:1–18.  
658 doi:10.1007/s10493-018-0320-5.
- 659 80. Frankham R. Genetics and extinction. *Biol Conserv.* 2005;126:131–40.  
660 doi:10.1016/j.biocon.2005.05.002.
- 661 81. King K, Lively C. Does genetic diversity limit disease spread in natural host populations?  
662 *Heredity.* 2012;109:199–203. doi:10.1038/hdy.2012.33.

663

664

665

666

667

668

669

670 **Table & Figure Captions**

671 **Table 1. nSSR summary information on each locus.** Names, type of repetitive motif, size  
672 range of alleles (bp), primer sequences (forward - F, reverse - R), number of alleles ( $n_A$ ),  
673 annealing temperature ( $T_a$ ), primer concentration used in PCR amplification ( $P_c$ ), and  
674 observed ( $H_O$ ) and expected ( $H_S$ ) heterozygosities, with corresponding p-values.

675 **Table 2. Hardy-Weinberg statistics across environments and subpopulation.** Shown are  
676 observed ( $H_O$ ) and expected ( $H_S$ ) heterozygosities, inbreeding coefficient ( $G_{IS}$ ) according to  
677 Nei's statistics (1987), and p-value.

678 **Table 3. Pairwise  $F_{ST}$  values for population differentiation.** Shown are the genetic  
679 differentiation values per subpopulation, Poor (P), and Rich (R) environments, Female (F),  
680 Male Fighter (MF), and Male Scrambler (MS) subpopulations. Significant differences are  
681 represented by \* after Bonferroni correction.

682 **Table 4. Summary of hierarchical AMOVA.** AMOVA including standard deviation (jack-  
683 knifing over loci), % of variation, and values of the F-statistic on different levels (between  
684 environment, among subpopulation within environment, among individuals within  
685 subpopulation, and within individuals), with their corresponding F and p-values.  $F_{CT}$  = the  
686 proportion of total variance that results from genetic differences among groups,  $F_{SC}$  = the  
687 proportion of variance among subpopulations within clusters,  $F_{IS}$  = the proportion of variance  
688 among individuals within subpopulation,  $F_{IT}$  = the proportion of variance among individuals  
689 within the total population.

690 **Figure 1. Dorsolateral photographic images of adult bulb mites (*Rhizoglyphus robini*)**  
691 **including the female, and male ARTs (fighter, and scrambler).** All individuals are  
692 presented at the same scale (scale bar: top left) and aligned from largest to smallest (left to  
693 right), with arrows indicating major structural differences in the third-leg pair among sexes  
694 and morphs. Photographs produced by Jan van Arkel, 2017.

695 **Figure 2. Genetic differentiation ( $F_{ST}$ ) of ART strategies to total population within each**  
696 **environment.** Significant differences are represented above bars, \*  $p < 0.05$ , \*\*  $p < 0.001$ . ART  
697 images kindly supplied by F.T. Rhebergen.

698 **Figure 3. STRUCTURE plot of subpopulation genetic clusters in different**  
699 **environments.** STRUCTURE plot illustrating the mean proportional membership (Q-value)  
700 of *R. robini* individuals (females, scramblers, fighters) for  $K=2$  across poor and rich  
701 environments.

702

0.2 mm

Female

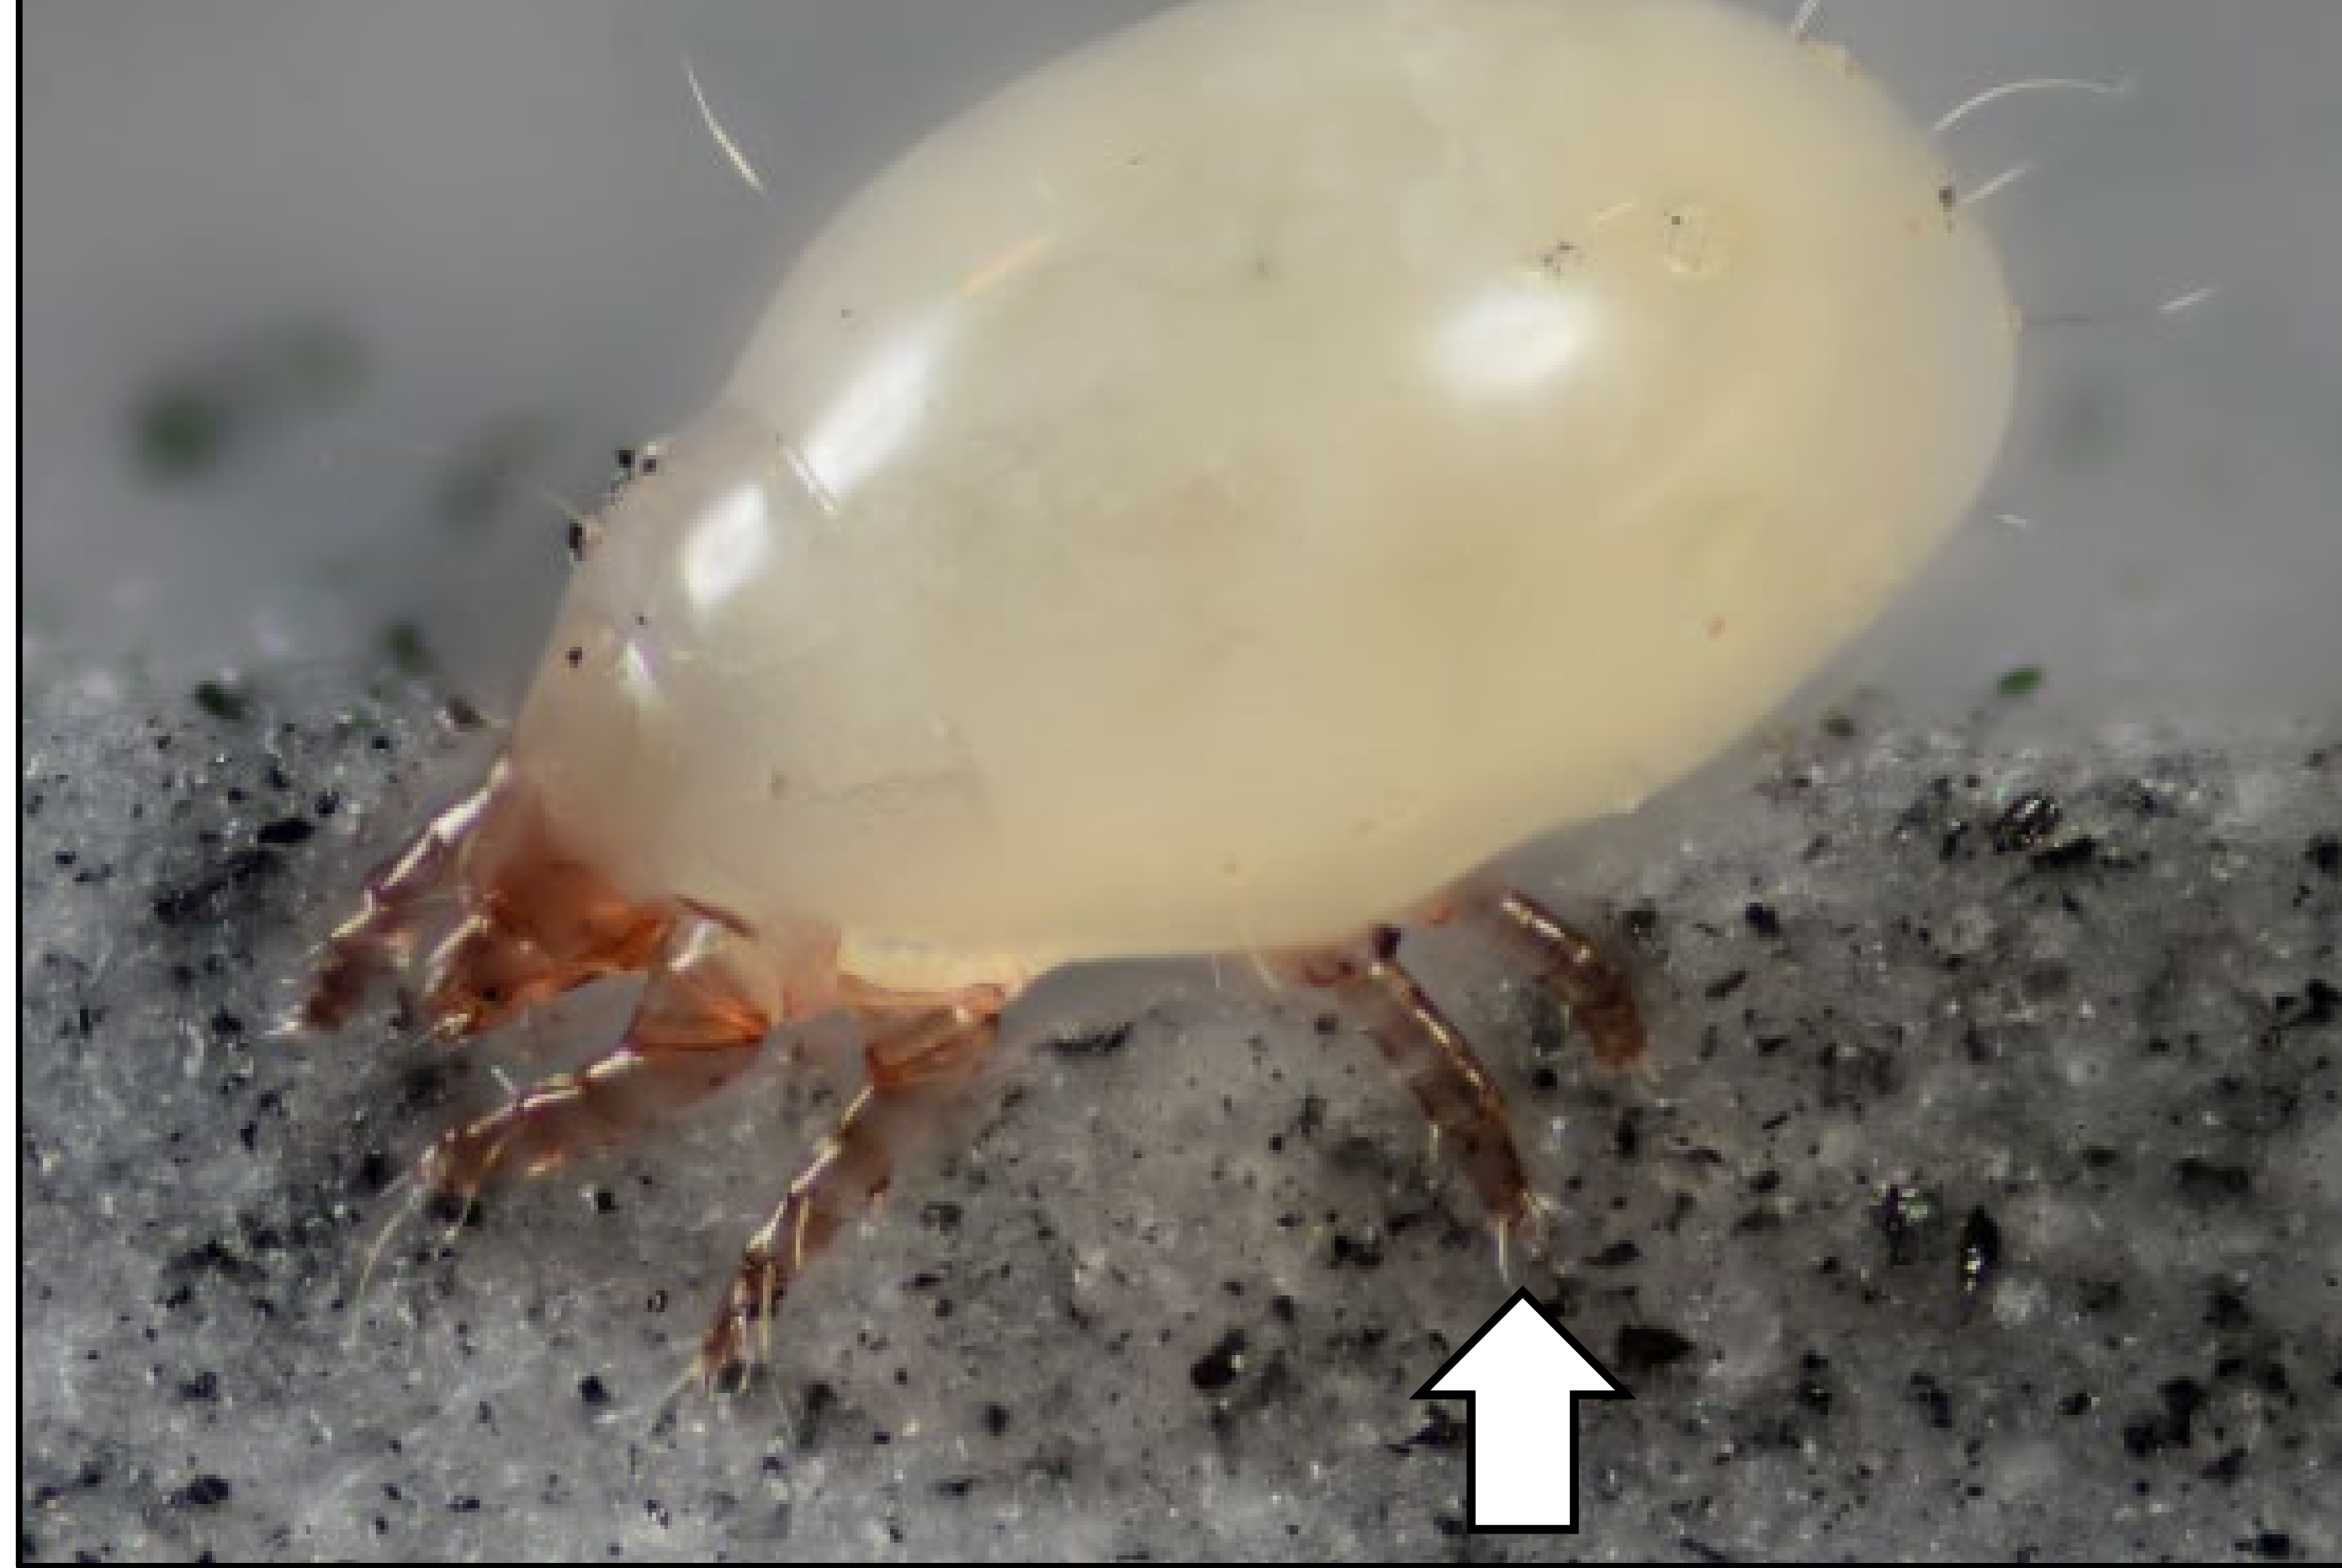

Fighter

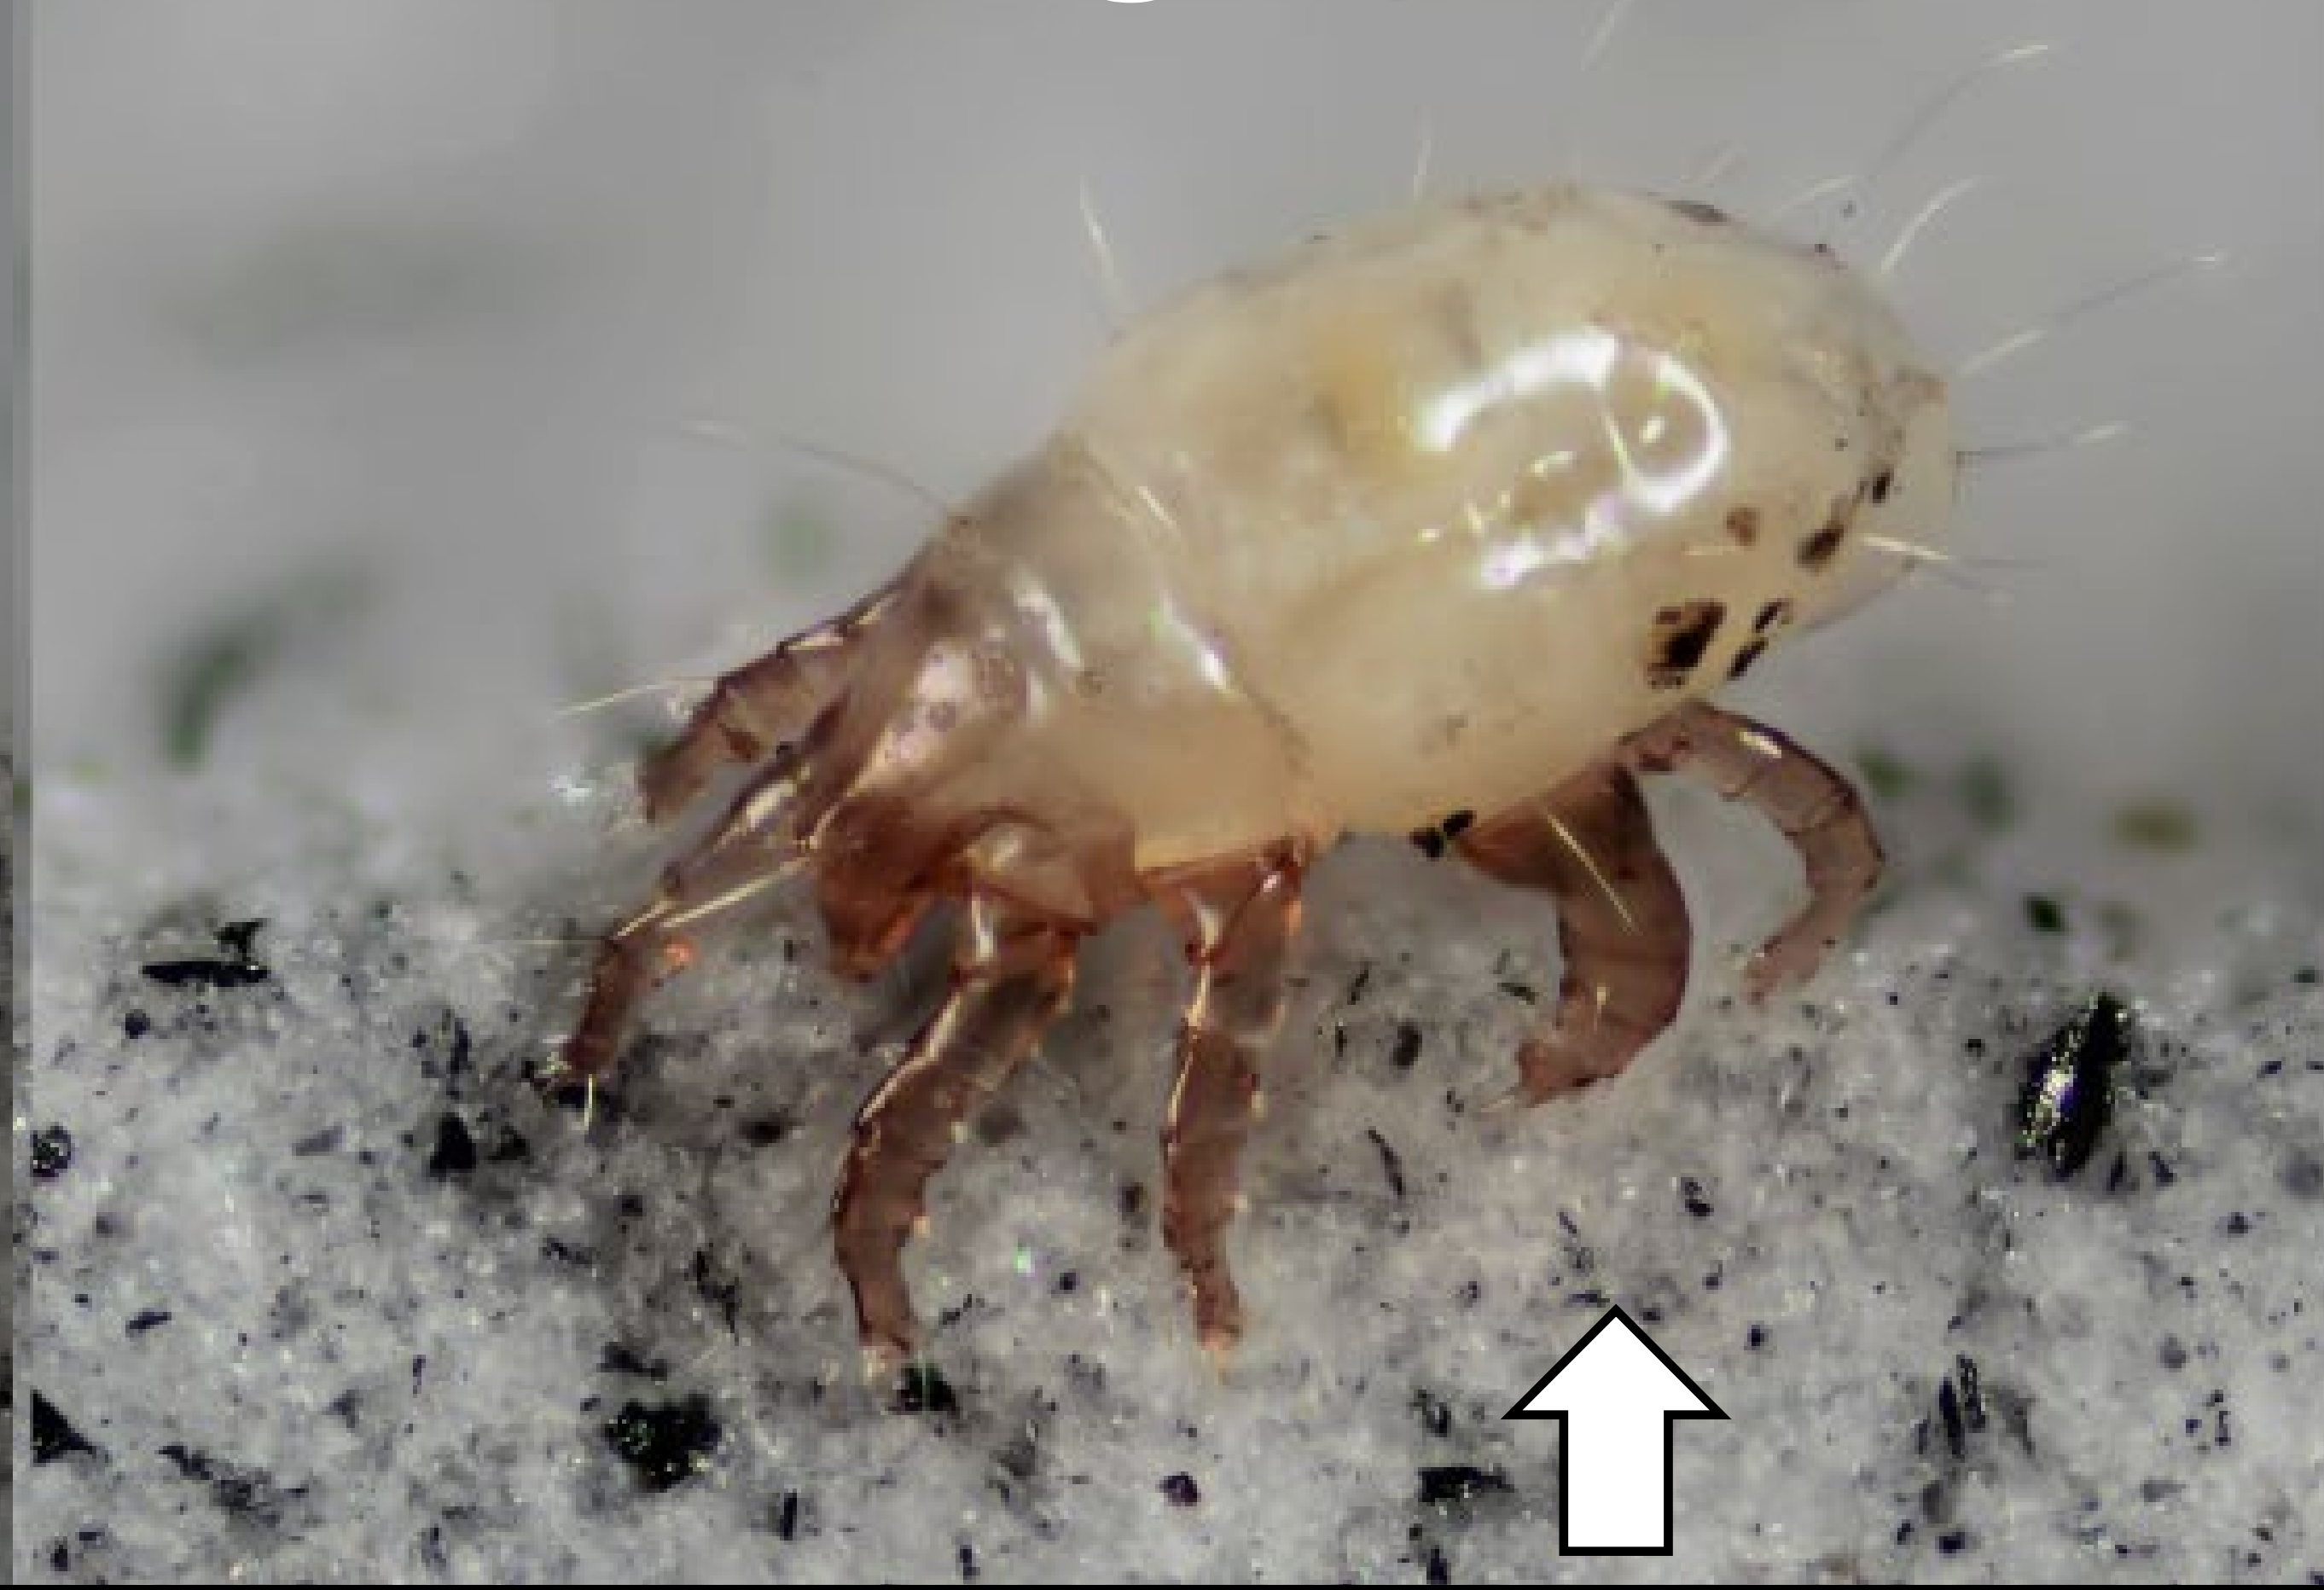

Scrambler

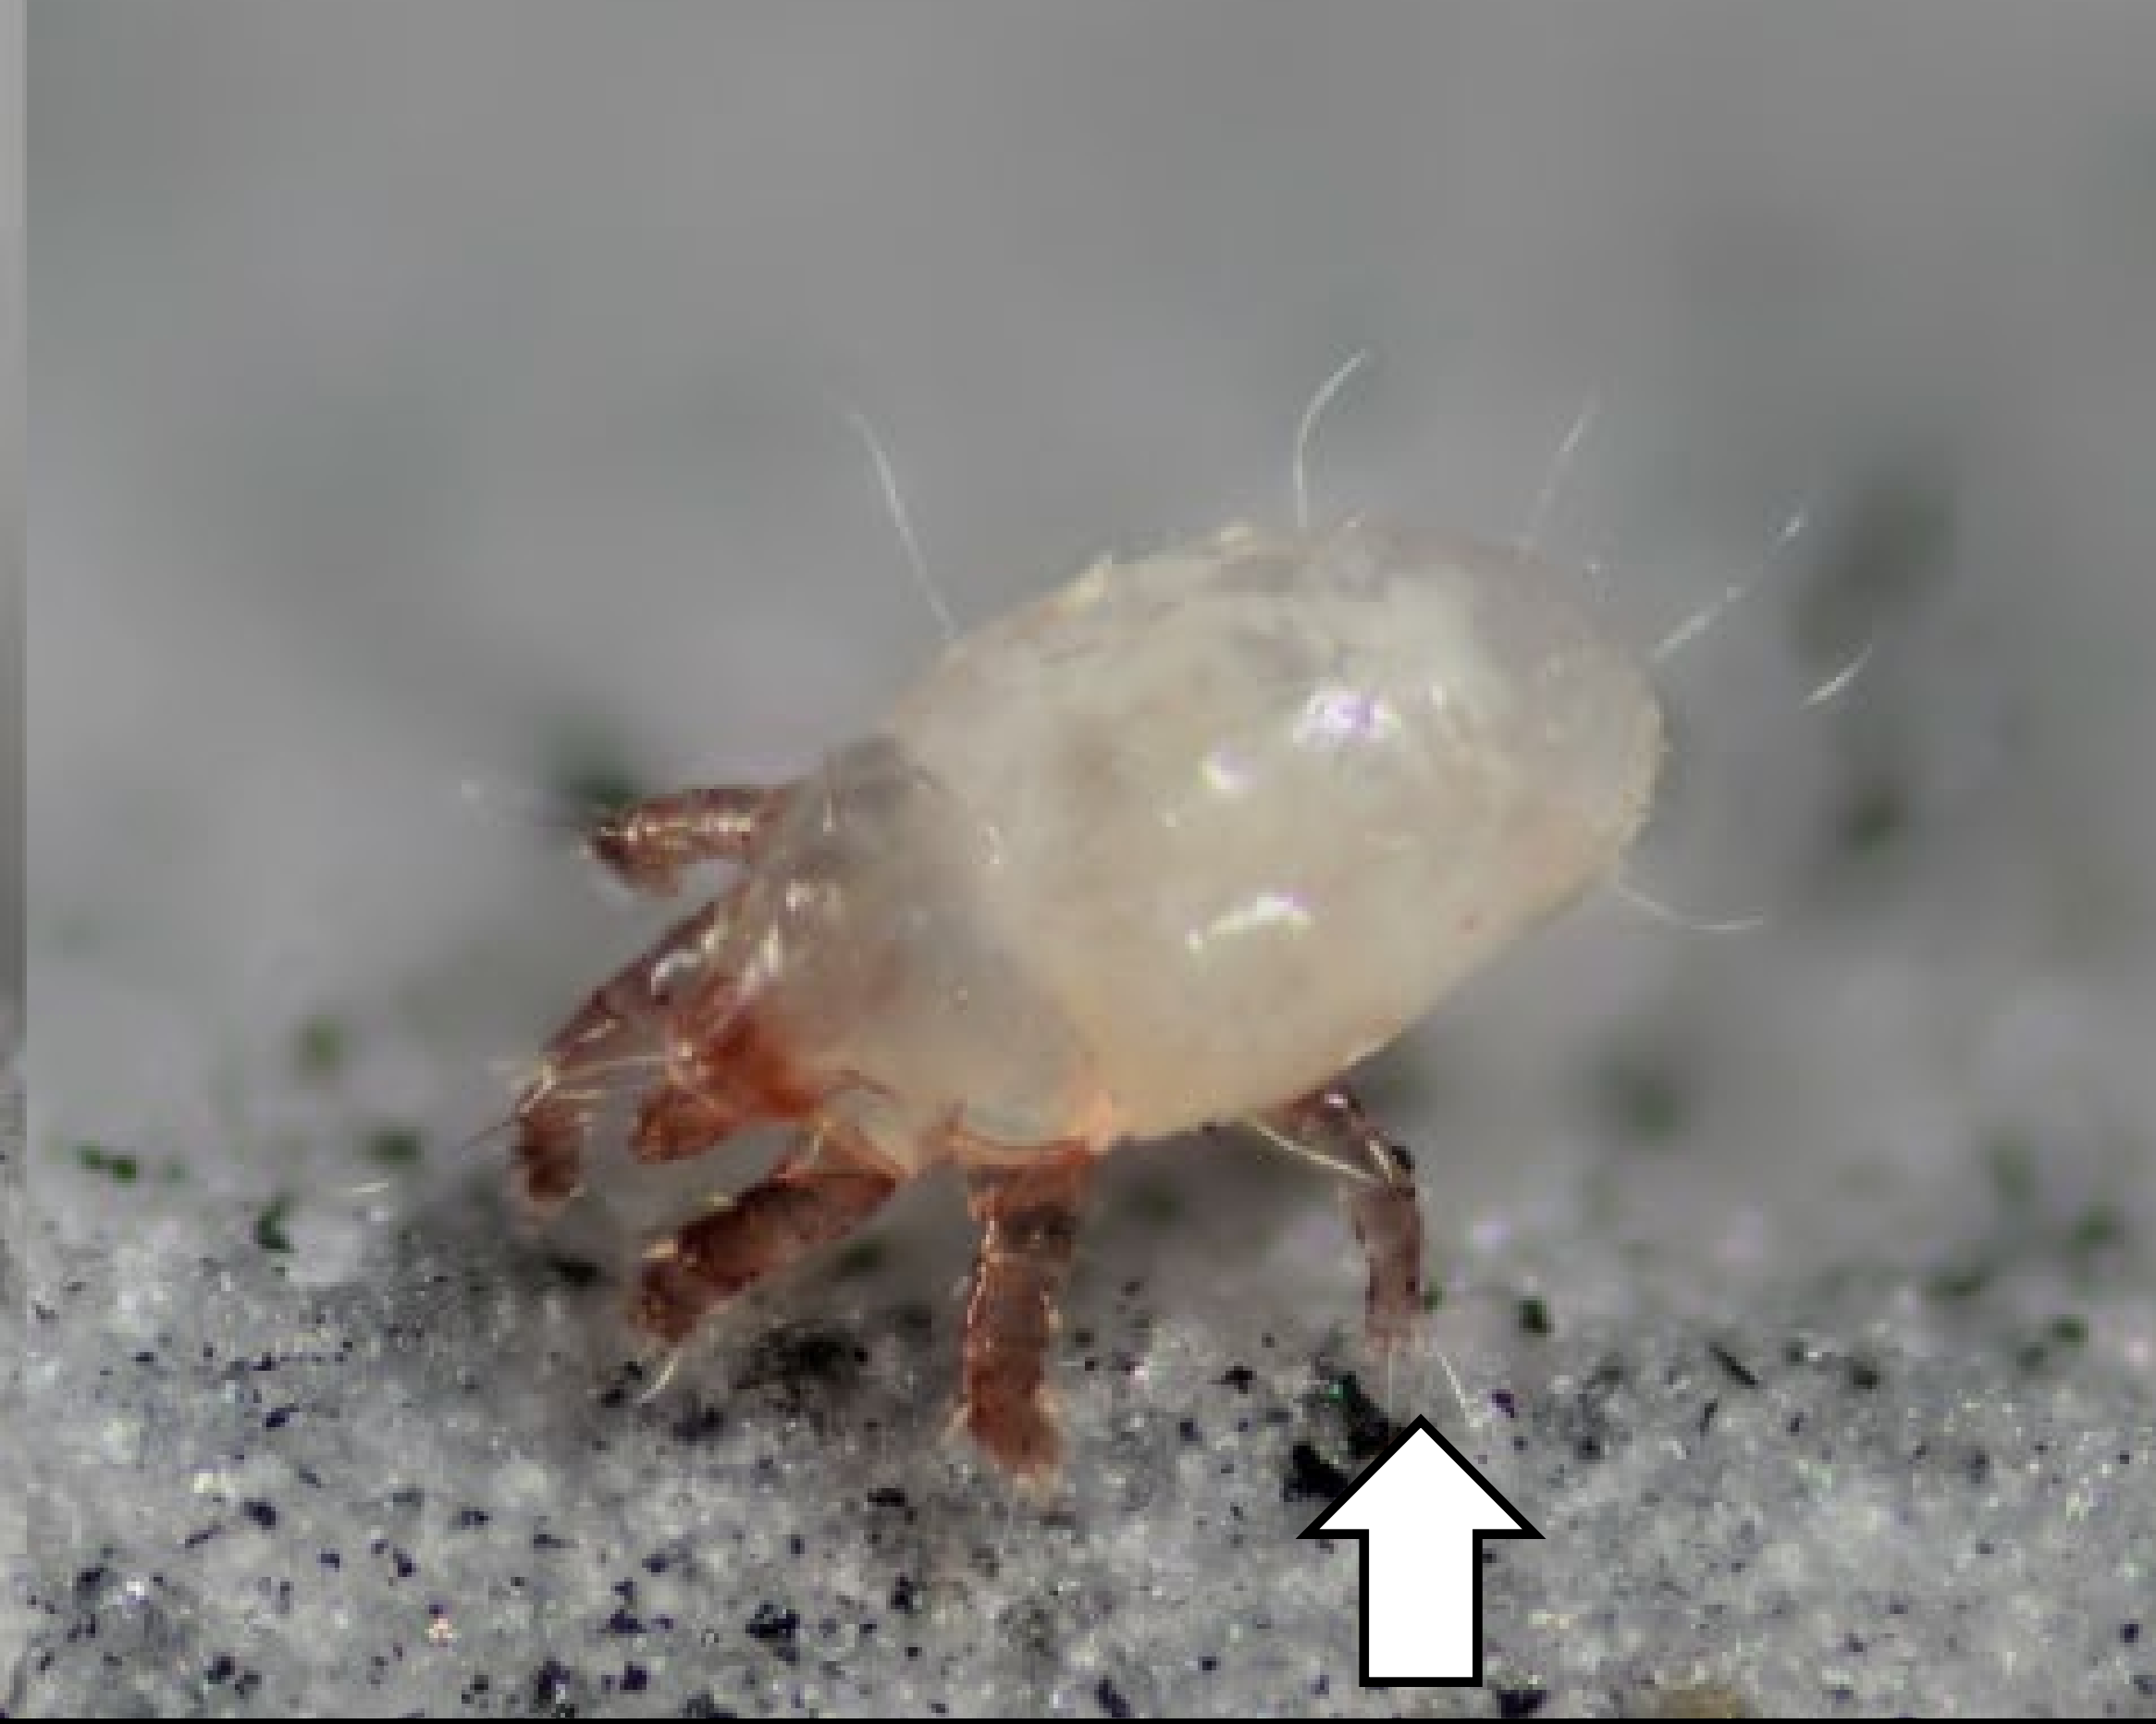

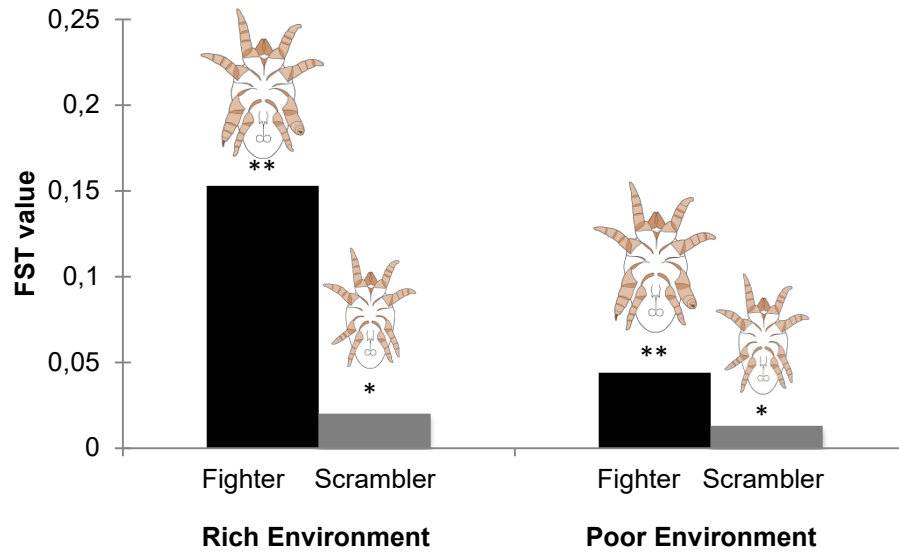

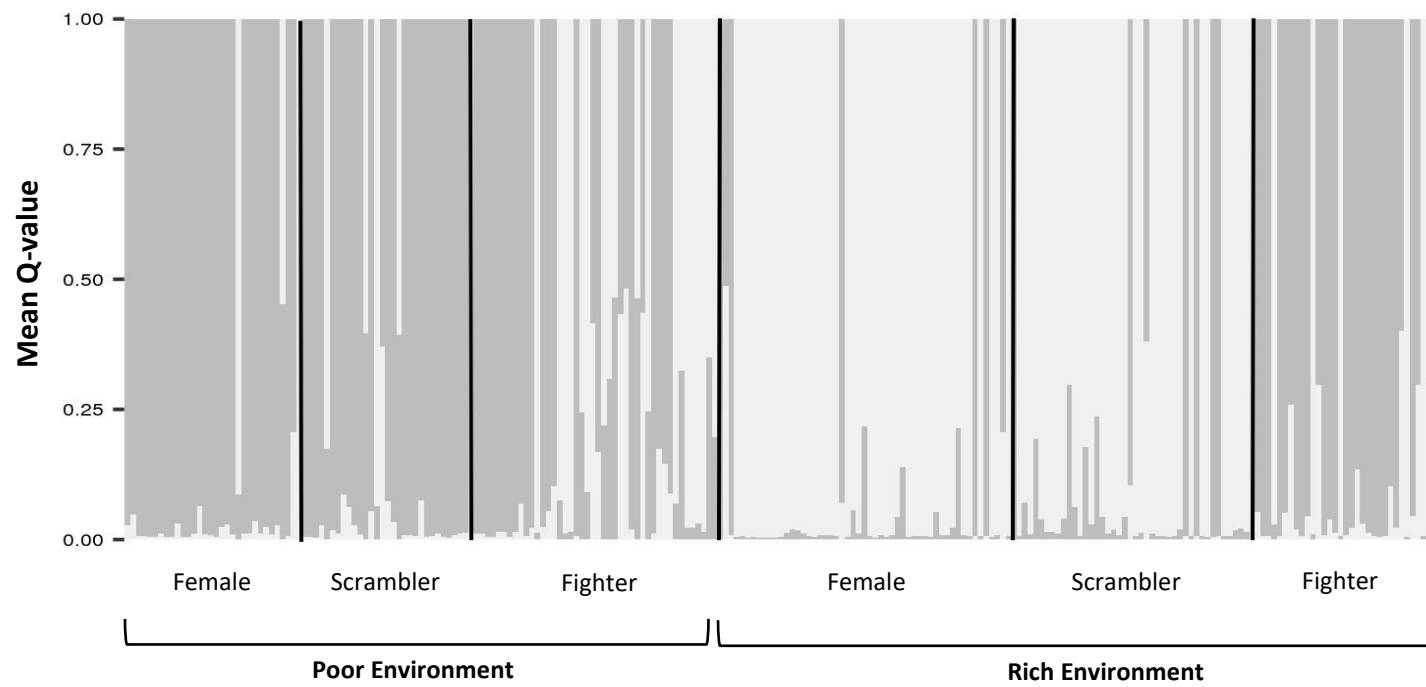



## Tables

**Table 1.**

| Locus         | Nucleotide repeat | Size (bp) | Primer sequence                                      | n <sub>A</sub> | T <sub>a</sub> (°C) | P <sub>c</sub> (μM) | H <sub>o</sub> | H <sub>s</sub> | p-value |
|---------------|-------------------|-----------|------------------------------------------------------|----------------|---------------------|---------------------|----------------|----------------|---------|
| <i>Rrms18</i> | CATT              | 130 – 143 | F: GCTTTCATTGTTGTACACCTC<br>R: ACAAACAGCAATGAGGTACAG | 4              | 53                  | 3                   | 0.171          | 0.488          | <0.001  |
| <i>Rrms34</i> | TGAA              | 106 – 136 | F: AATAATGTTTCGCACTGAGAG<br>R: CAAGGTAGACCGTTACAGTGA | 11             | 53                  | 15                  | 0.748          | 0.772          | 0.183   |
| <i>Rrms40</i> | CACT              | 85 – 118  | F: GTAATGGCCATGTCCTAGC<br>R: TTTGAGACTCGAAAGAAACAG   | 9              | 53                  | 10                  | 0.246          | 0.577          | <0.001  |
| <i>Rrms44</i> | GAGT              | 91 – 98   | F: CTATGTTGAAAAGGCATCAAT<br>R: GCAAAGTGTGTTCACTCAAT  | 3              | 51                  | 15                  | 0.438          | 0.404          | 0.108   |
| <i>Rrms72</i> | CATT              | 128 – 142 | F: GAAATGTCAAAGACGAAAGTG<br>R: TTGAAGTGCGAAATTAGTCAT | 8              | 51                  | 15                  | 0.707          | 0.711          | <0.05   |
| <i>Rrms91</i> | GAGT              | 84 – 92   | F: CTATGTTGAAAAGGCATCAAT<br>R: GCAAAGTGTGTTCACTCAAT  | 4              | 51                  | 5                   | 0.587          | 0.625          | <0.001  |
| <i>Rrms03</i> | AATA              | 147 – 149 | F: AACTTGGTCTAAAGTGAAGCA<br>R: TTGAAAAGTCACTAAGCCAAC | 2              | 53                  | 5                   | -              | -              | -       |
| <i>Rrms23</i> | CTCC              | 141 – 142 | F: CCGTAATGTACGACAAAGTGT<br>R: AAGGTAATCTATCCCCCACT  | 2              | 53                  | 15                  | -              | -              | -       |
| <i>Rrms61</i> | CGA               | 74 – 76   | F: TAAATAGATCGAGACGACCAA<br>R: TCTCTGTGTGAACGATCTGTA | 2              | 53                  | 15                  | -              | -              | -       |

**Table 2.**

|      | Subpopulation     | H <sub>O</sub> | H <sub>S</sub> | G <sub>IS</sub> | p-value |
|------|-------------------|----------------|----------------|-----------------|---------|
| Poor |                   | 0.487          | 0.578          | 0.158           | <0.001  |
|      | <i>Females</i>    | 0.457          | 0.520          | 0.120           | <0.05   |
|      | <i>Fighters</i>   | 0.390          | 0.566          | 0.311           | <0.001  |
|      | <i>Scramblers</i> | 0.583          | 0.603          | 0.032           | 0.307   |
| Rich |                   | 0.398          | 0.600          | 0.336           | <0.001  |
|      | <i>Females</i>    | 0.362          | 0.501          | 0.277           | <0.001  |
|      | <i>Fighter</i>    | 0.329          | 0.581          | 0.436           | <0.001  |
|      | <i>Scramblers</i> | 0.479          | 0.605          | 0.208           | <0.001  |

**Table 3.**

|      | P_F    | P_MF   | P_MS   | R_F    | R_MF   | R_MS |
|------|--------|--------|--------|--------|--------|------|
| P_F  | --     |        |        |        |        |      |
| P_MF | 0.063* | --     |        |        |        |      |
| P_MS | 0.024  | 0.036* | --     |        |        |      |
| R_F  | 0.269* | 0.147* | 0.214* | --     |        |      |
| R_MF | 0.085* | 0.103* | 0.109* | 0.213* | --     |      |
| R_MS | 0.178* | 0.082* | 0.131* | 0.054* | 0.102* | --   |

**Table 4.**

| Variance component                         | SD    | Variation (%) | Statistic       | F-value | p-value |
|--------------------------------------------|-------|---------------|-----------------|---------|---------|
| <i>Between environment</i>                 | 0.036 | 0.083         | F <sub>CT</sub> | 0.083   | 0.206   |
| <i>Among subpopulations in environment</i> | 0.038 | 0.078         | F <sub>SC</sub> | 0.085   | <0.001  |
| <i>Among individuals in subpopulation</i>  | 0.113 | 0.184         | F <sub>IS</sub> | 0.219   | <0.001  |
| <i>Within individuals</i>                  | 0.120 | 0.655         | F <sub>IT</sub> | 0.345   | <0.001  |
